# Supplementary material
Source: ML conference proceedings conference paper supplement (https://openreview.net/forum?id=MsRDyHL2DW)

# Ackley(D10)

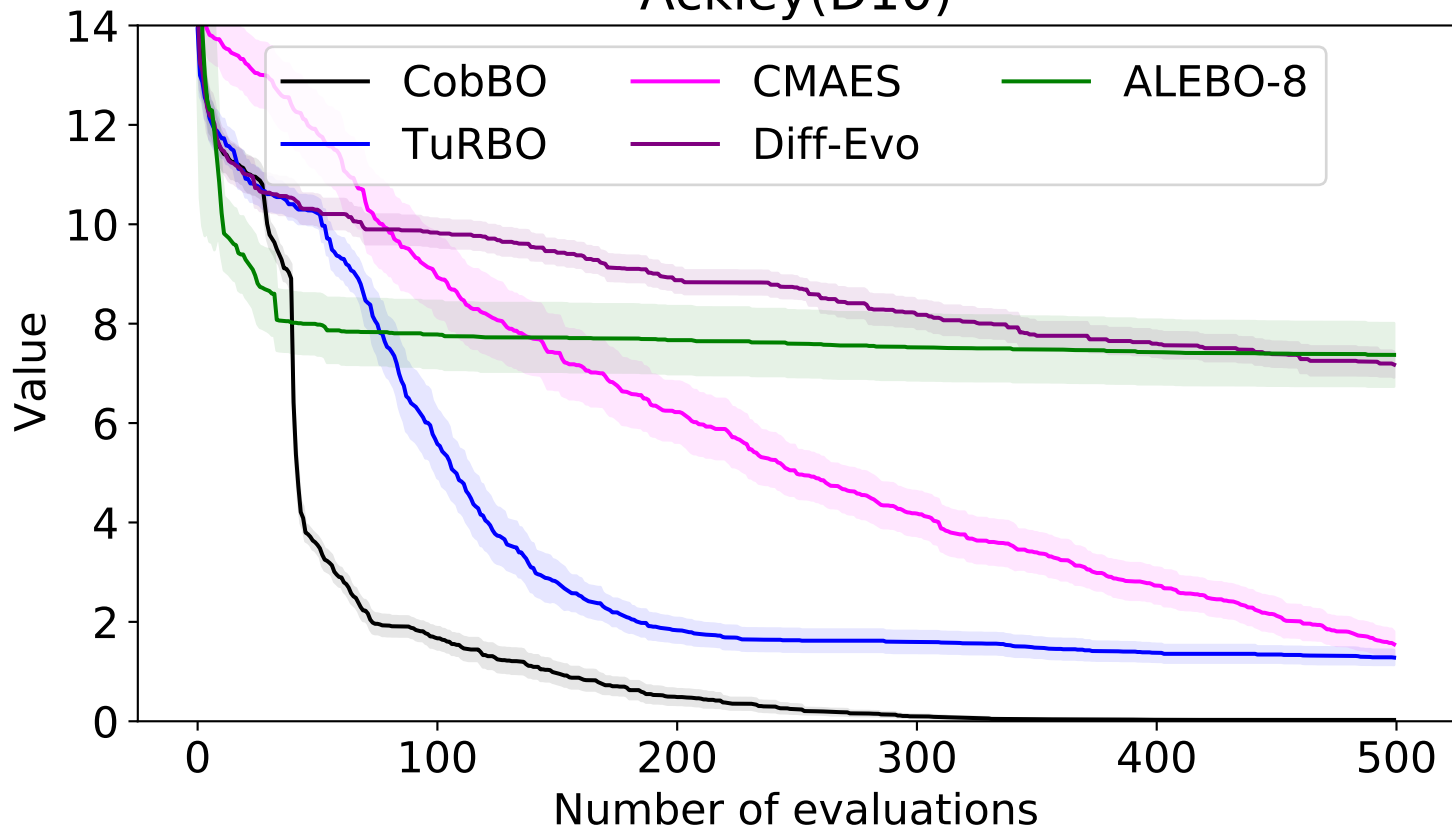

Supplement: supplementary_material [file attachment]

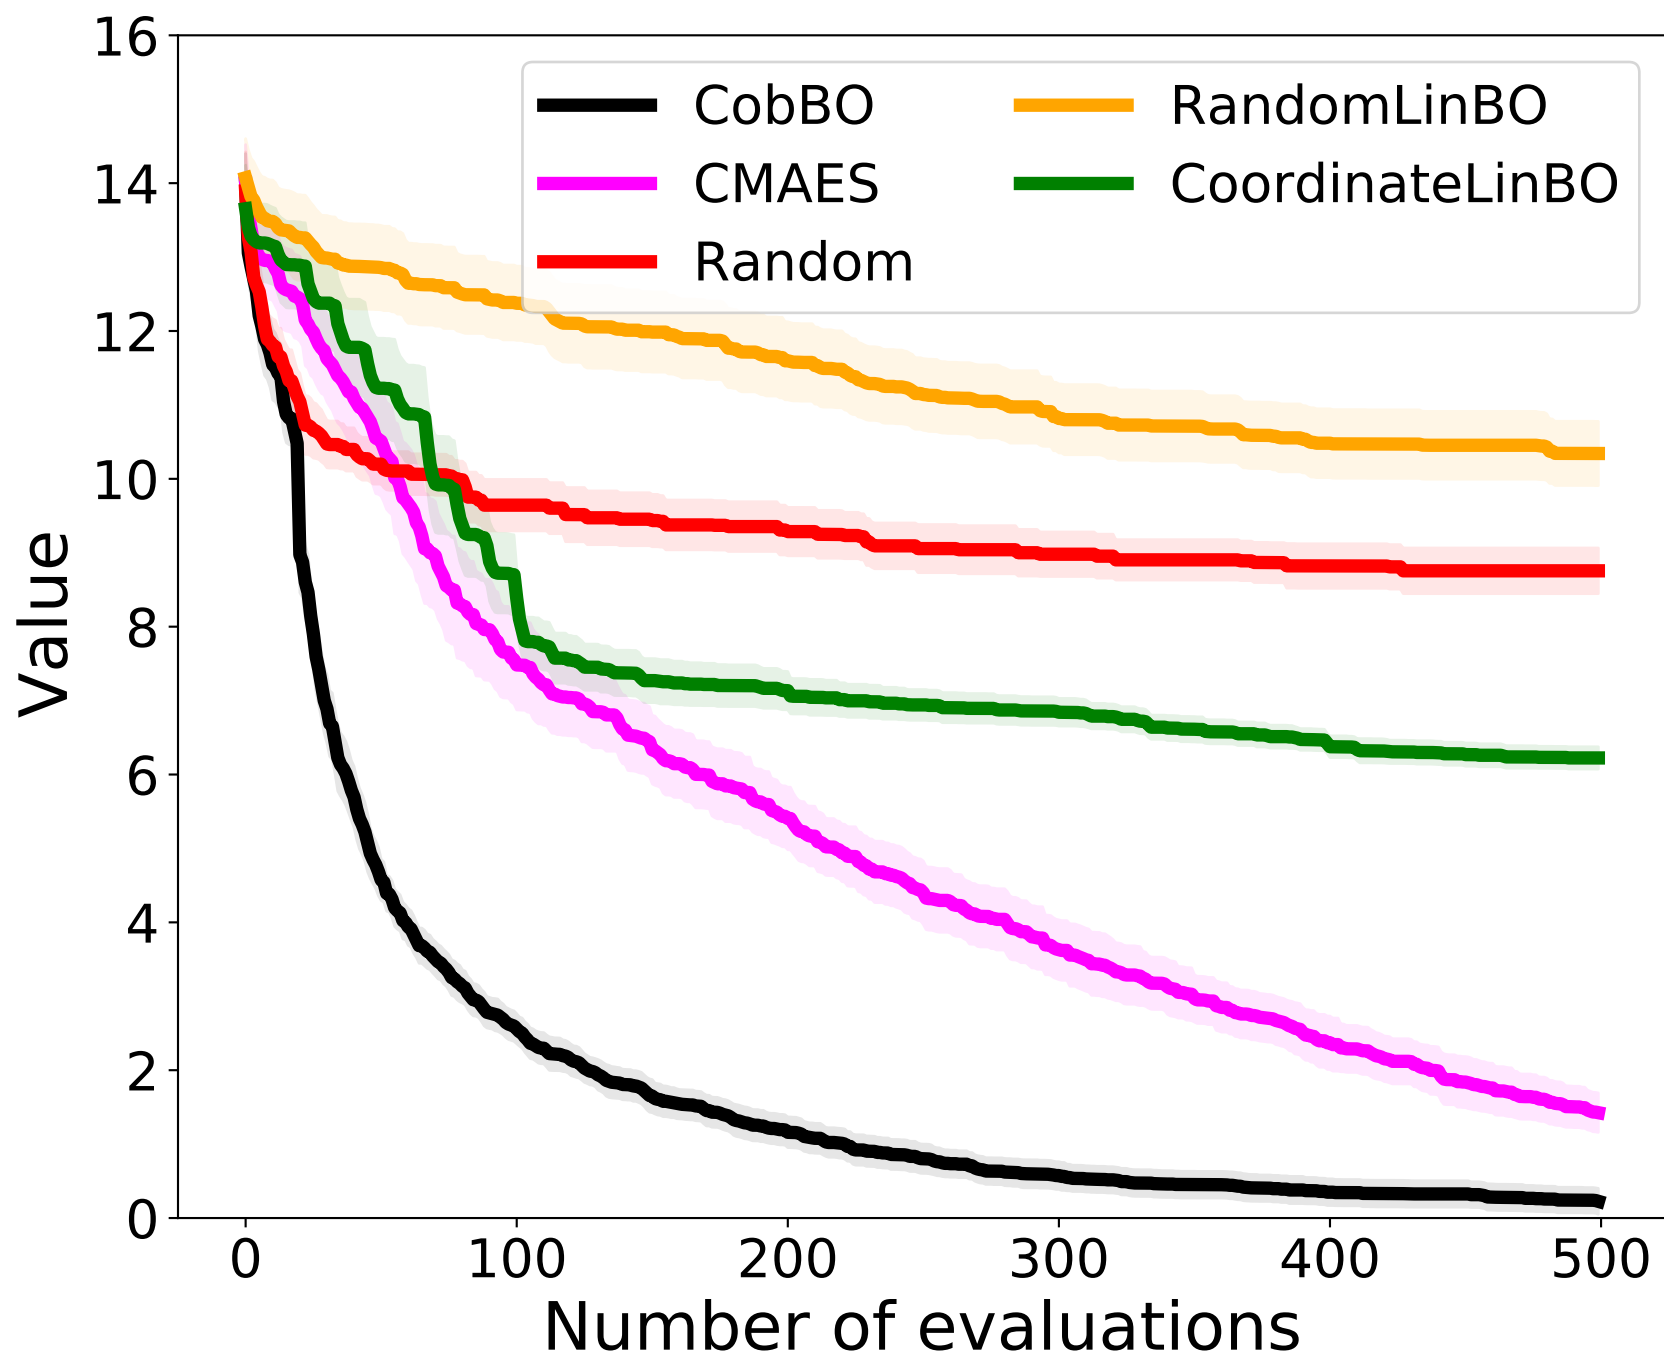

Supplement: supplementary_material [file attachment]

Levy(10D)

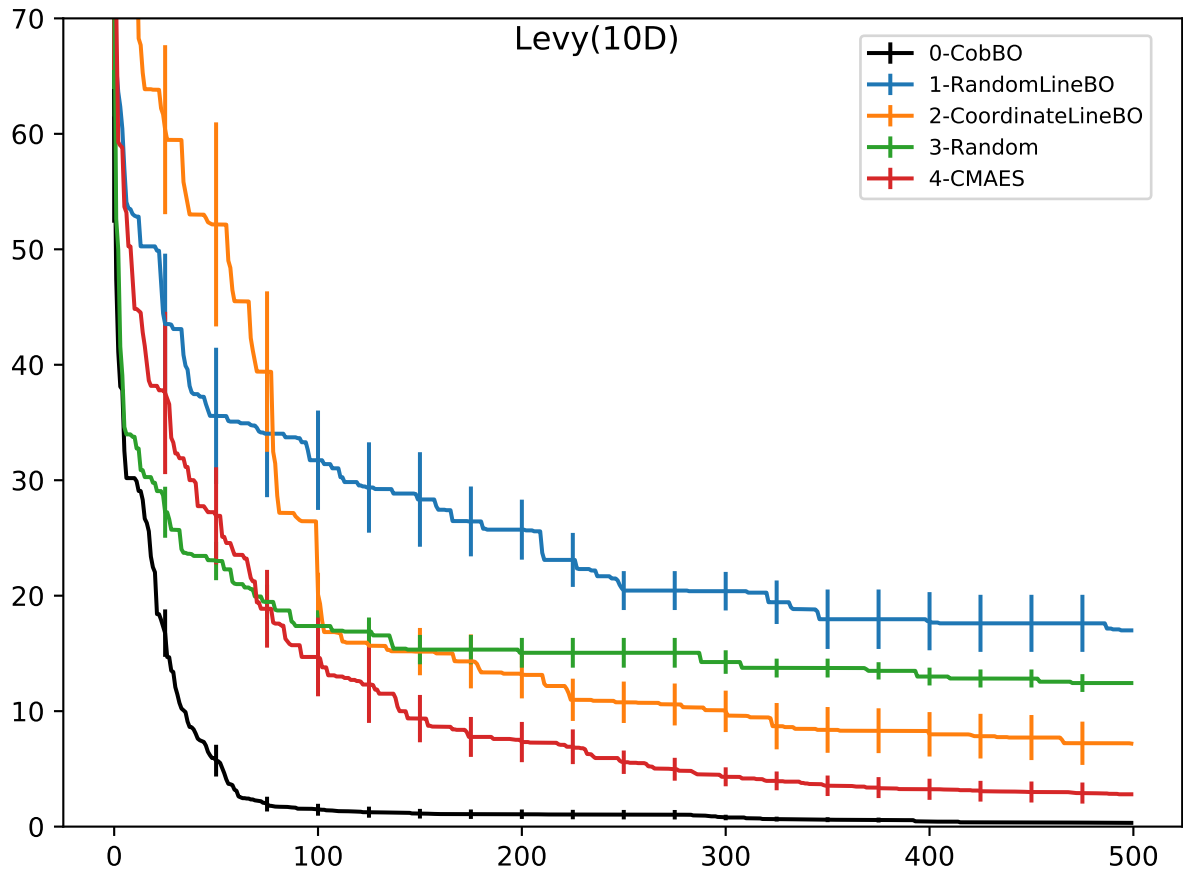

Supplement: supplementary_material [file attachment]

100D Levy Function

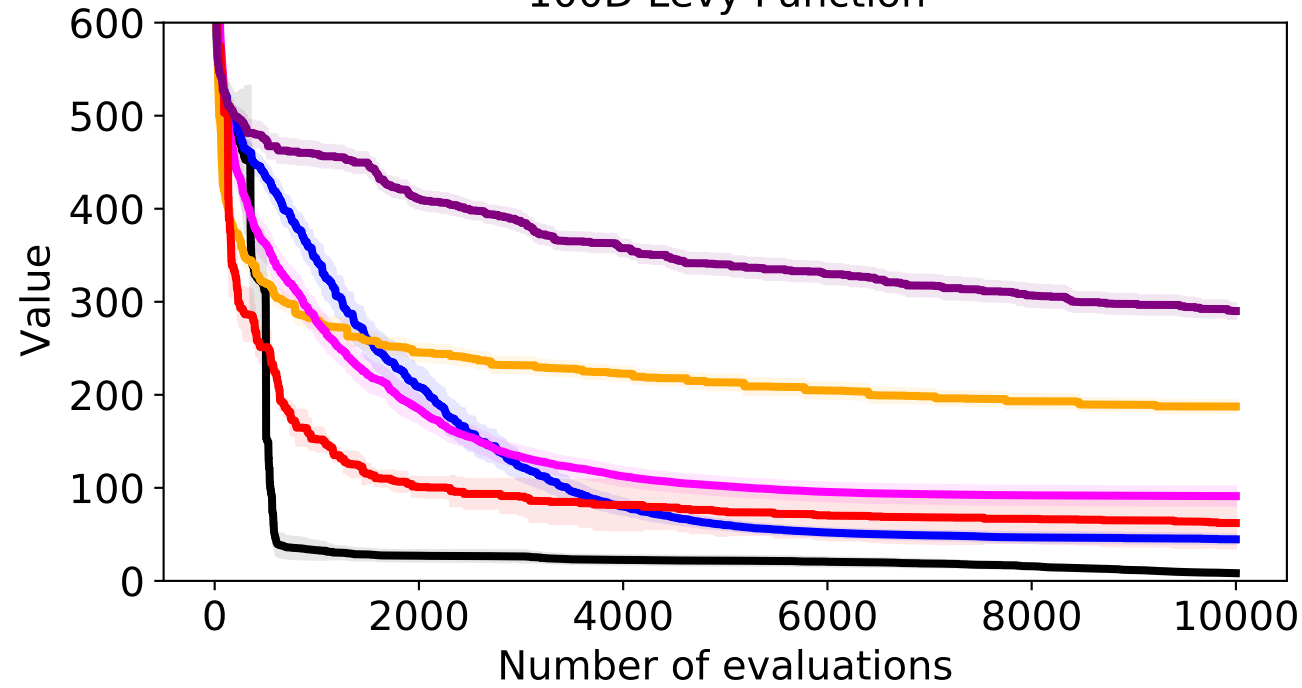

100D Rastrigin Function

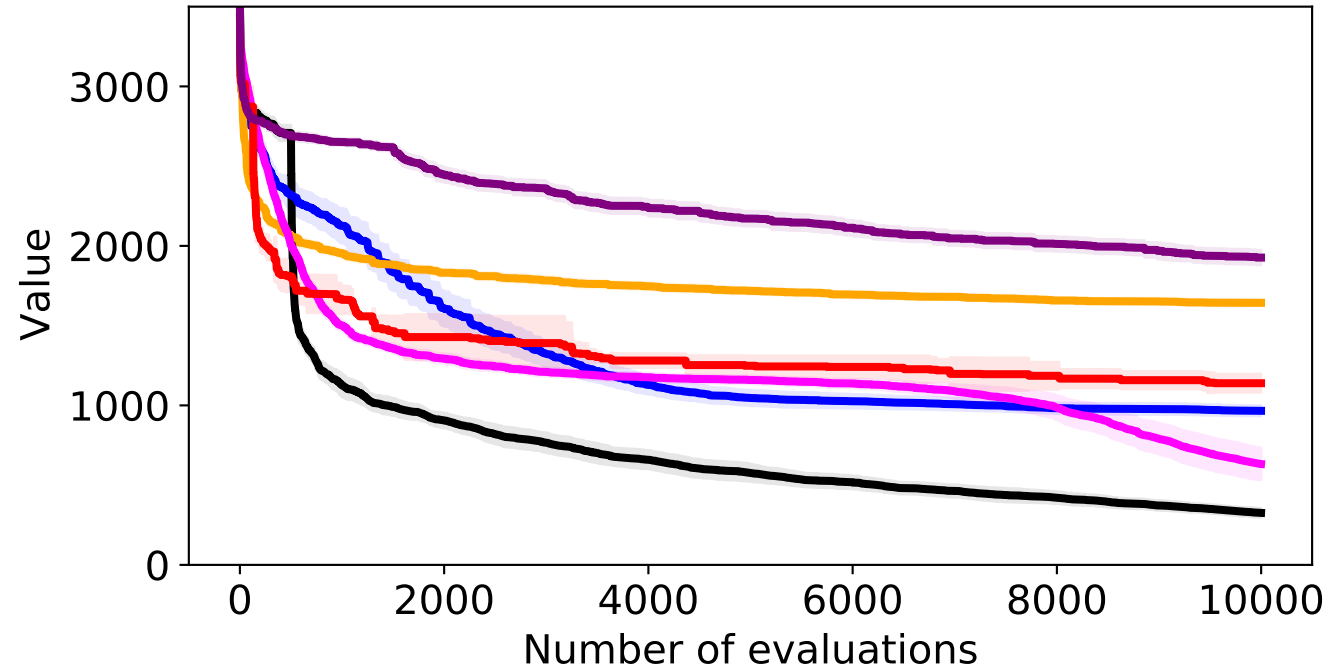

— CobBO — TuRBO — TPE — CMAES — ATPE — Diff-Evo

Supplement: supplementary_material [file attachment]

# Ackley(D10)

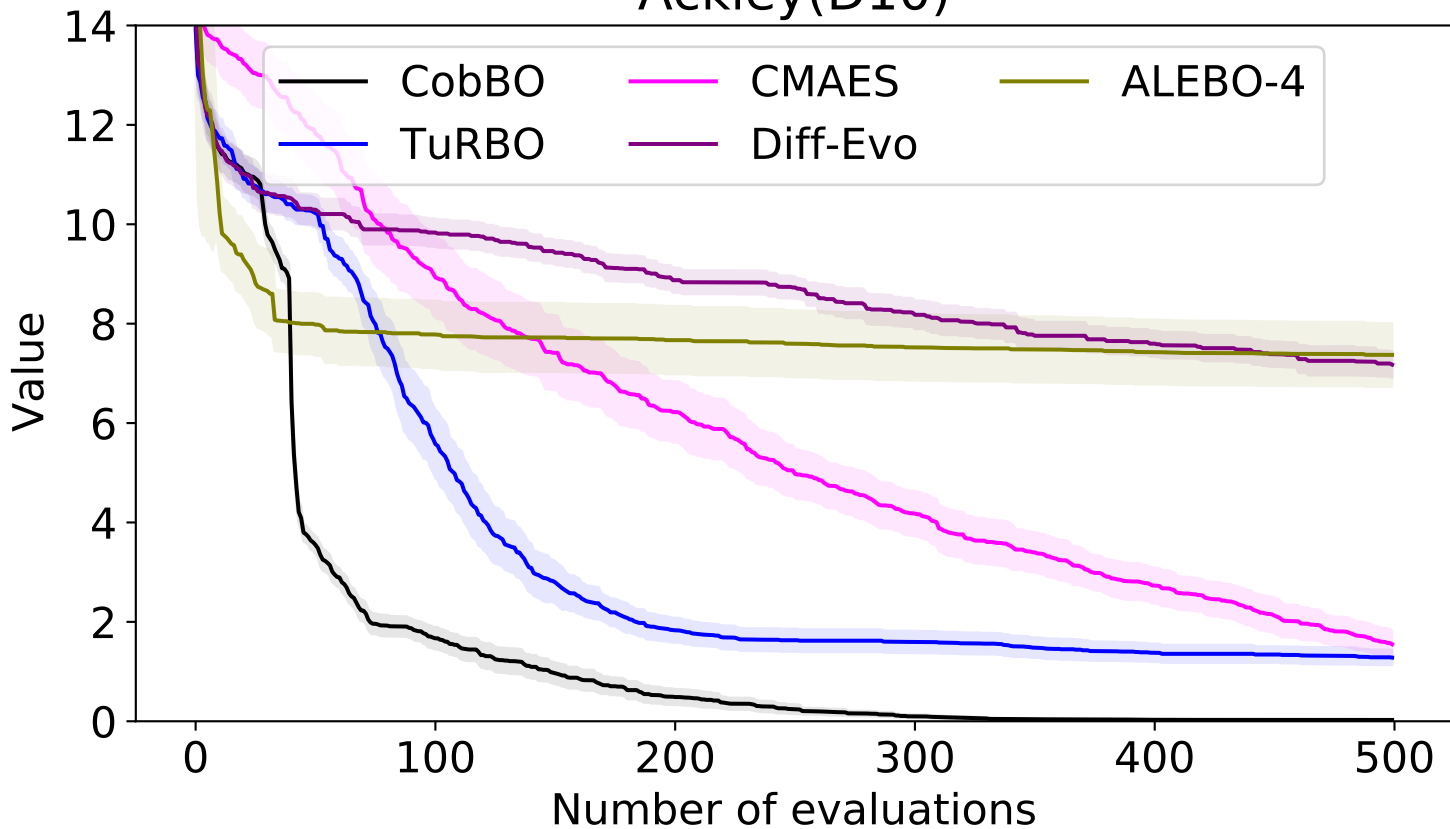

Supplement: supplementary_material [file attachment]

Hartmann6 ( $D=1000$ ,  $d=6$ )

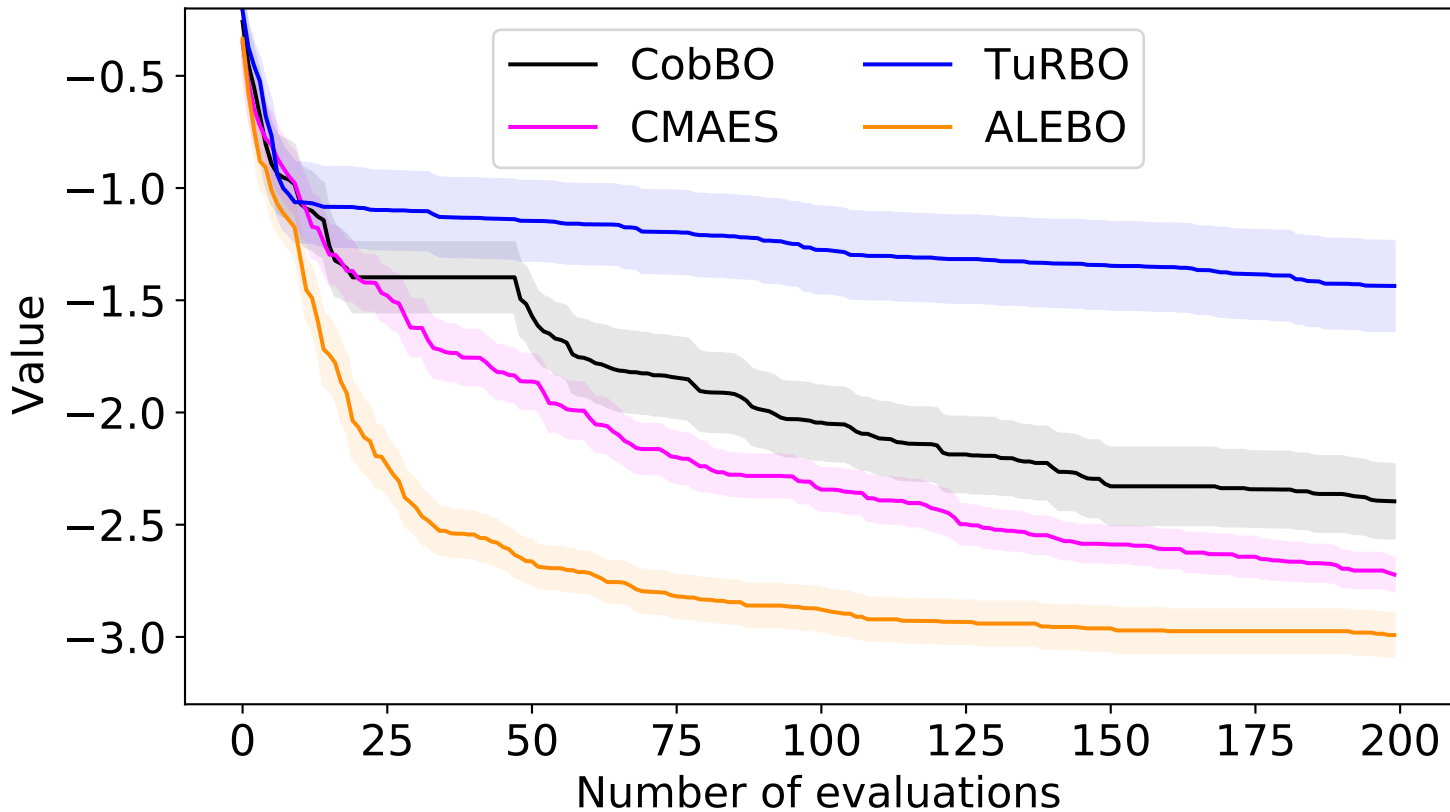

Supplement: supplementary_material [file attachment]

# Michalewicz(D10)

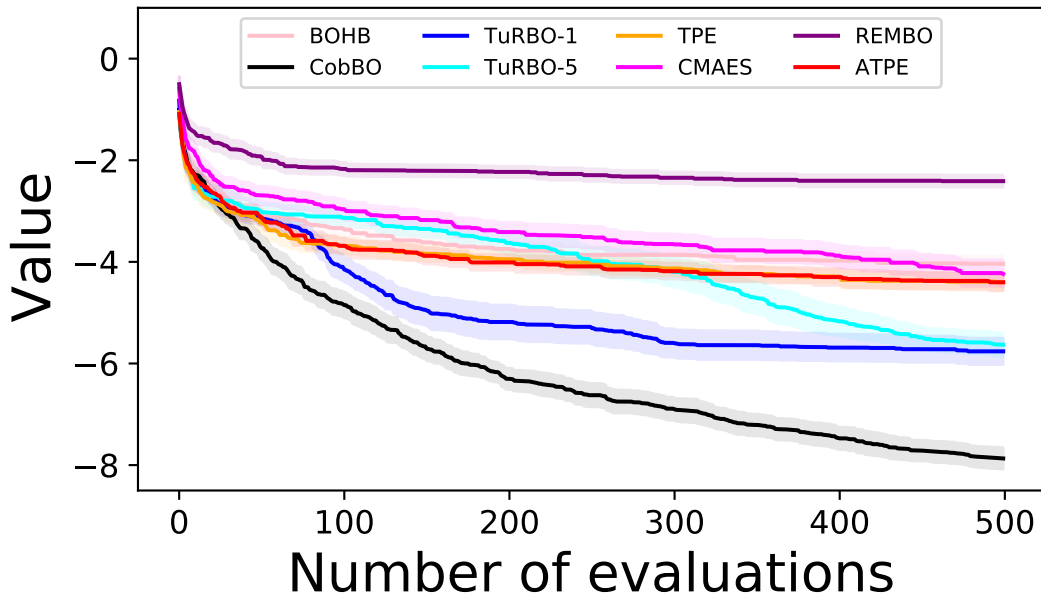

Supplement: supplementary_material [file attachment]

# CobBO vs Vanilla for 500 iterations: Runtime and Best Value

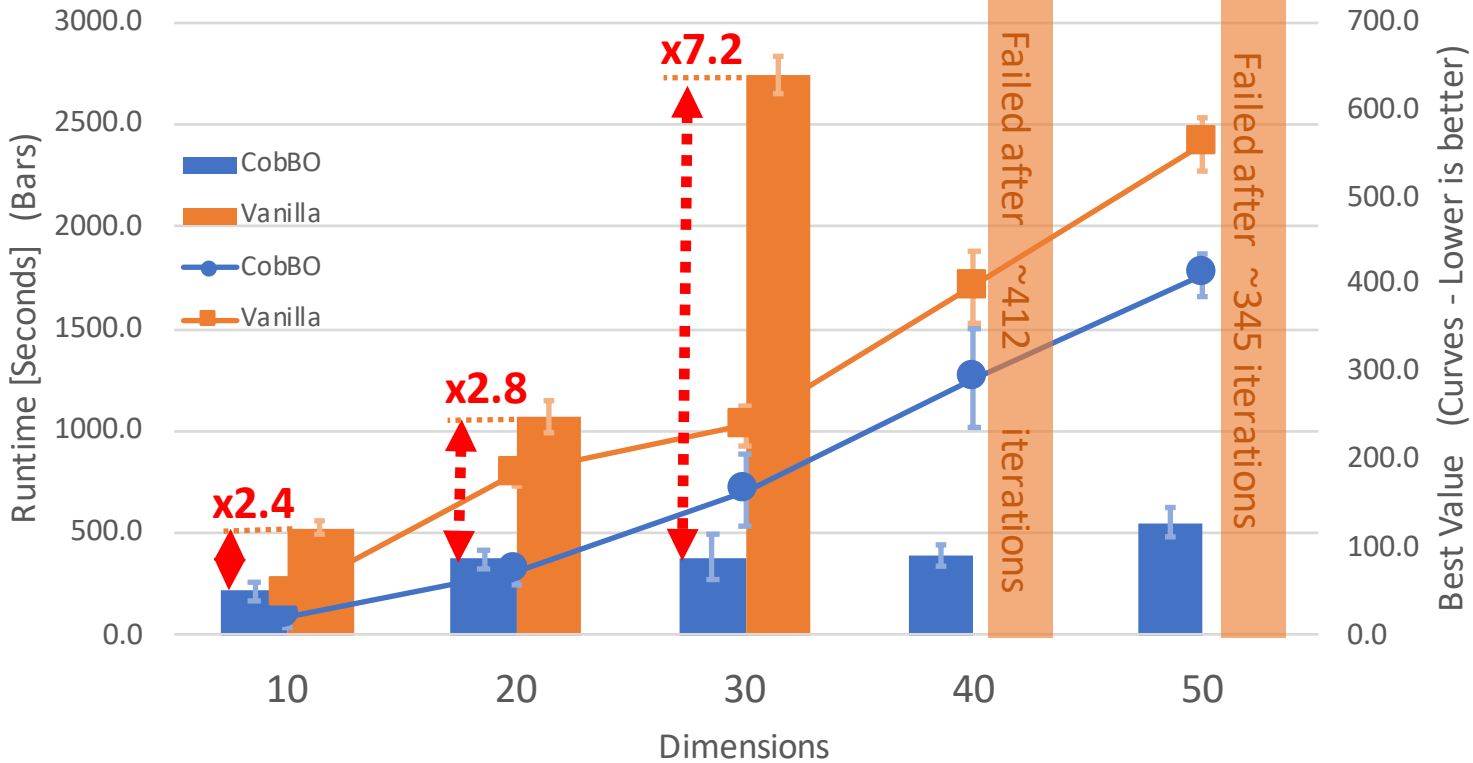

Supplement: supplementary_material [file attachment]

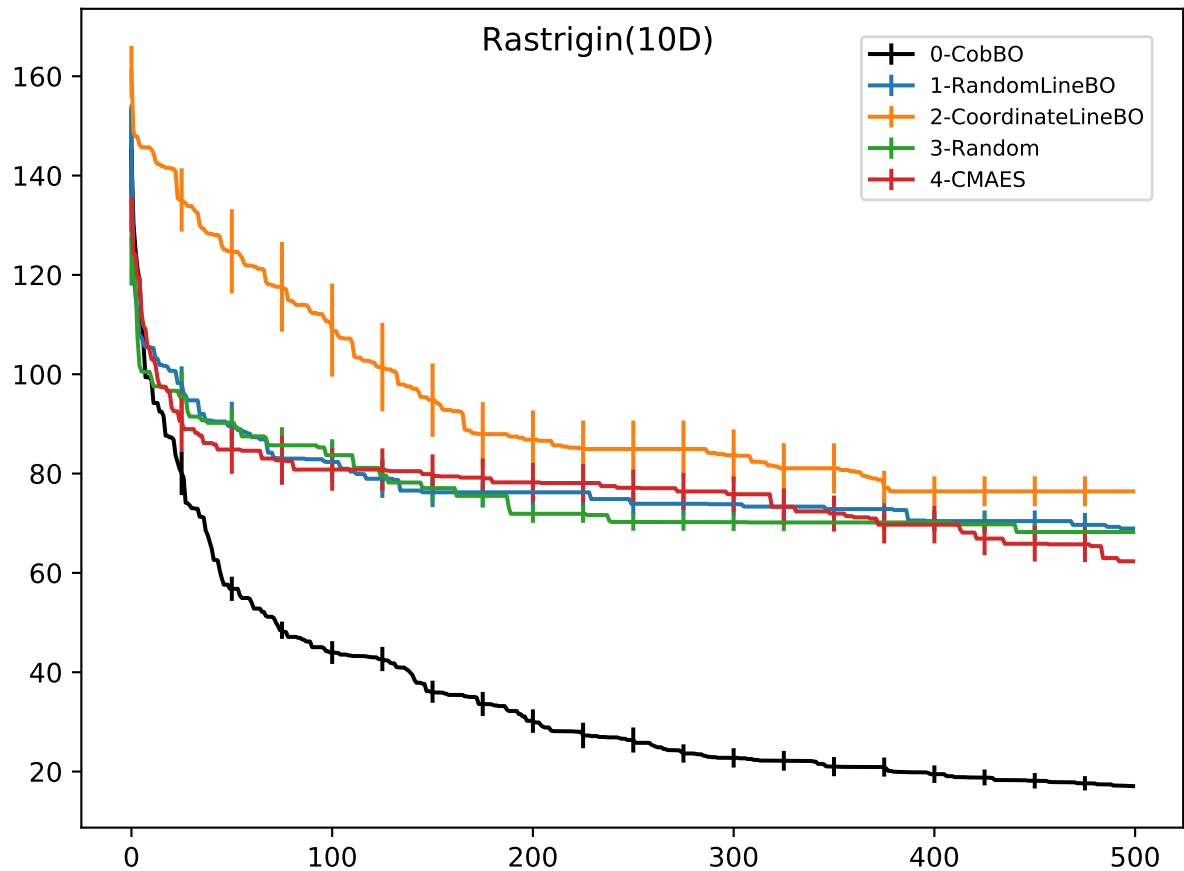

Supplement: supplementary_material [file attachment]

10D Ackley Function

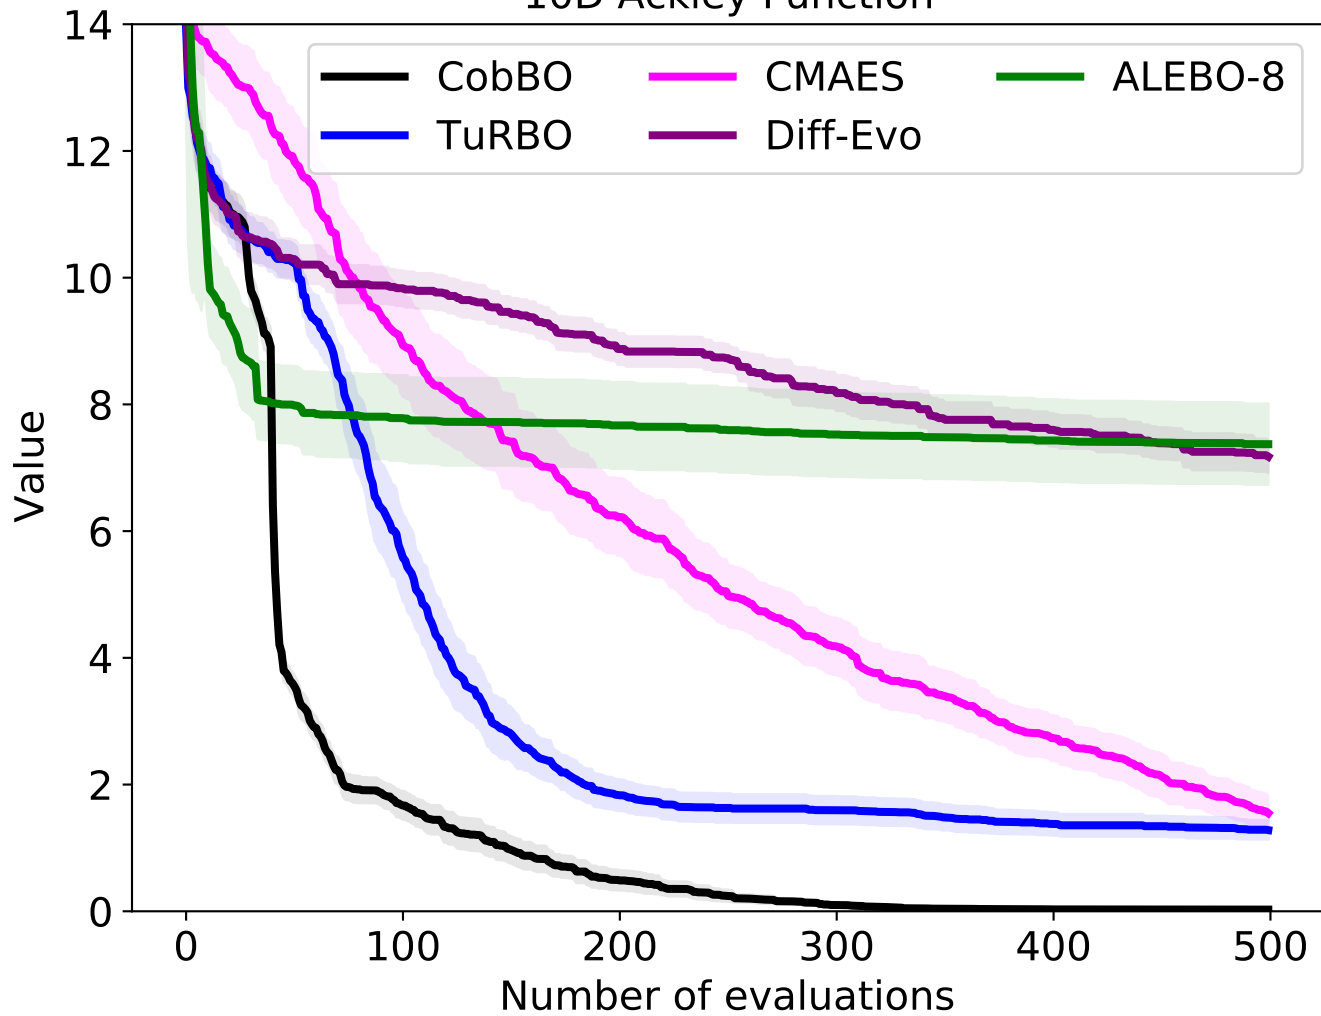

Supplement: supplementary_material [file attachment]

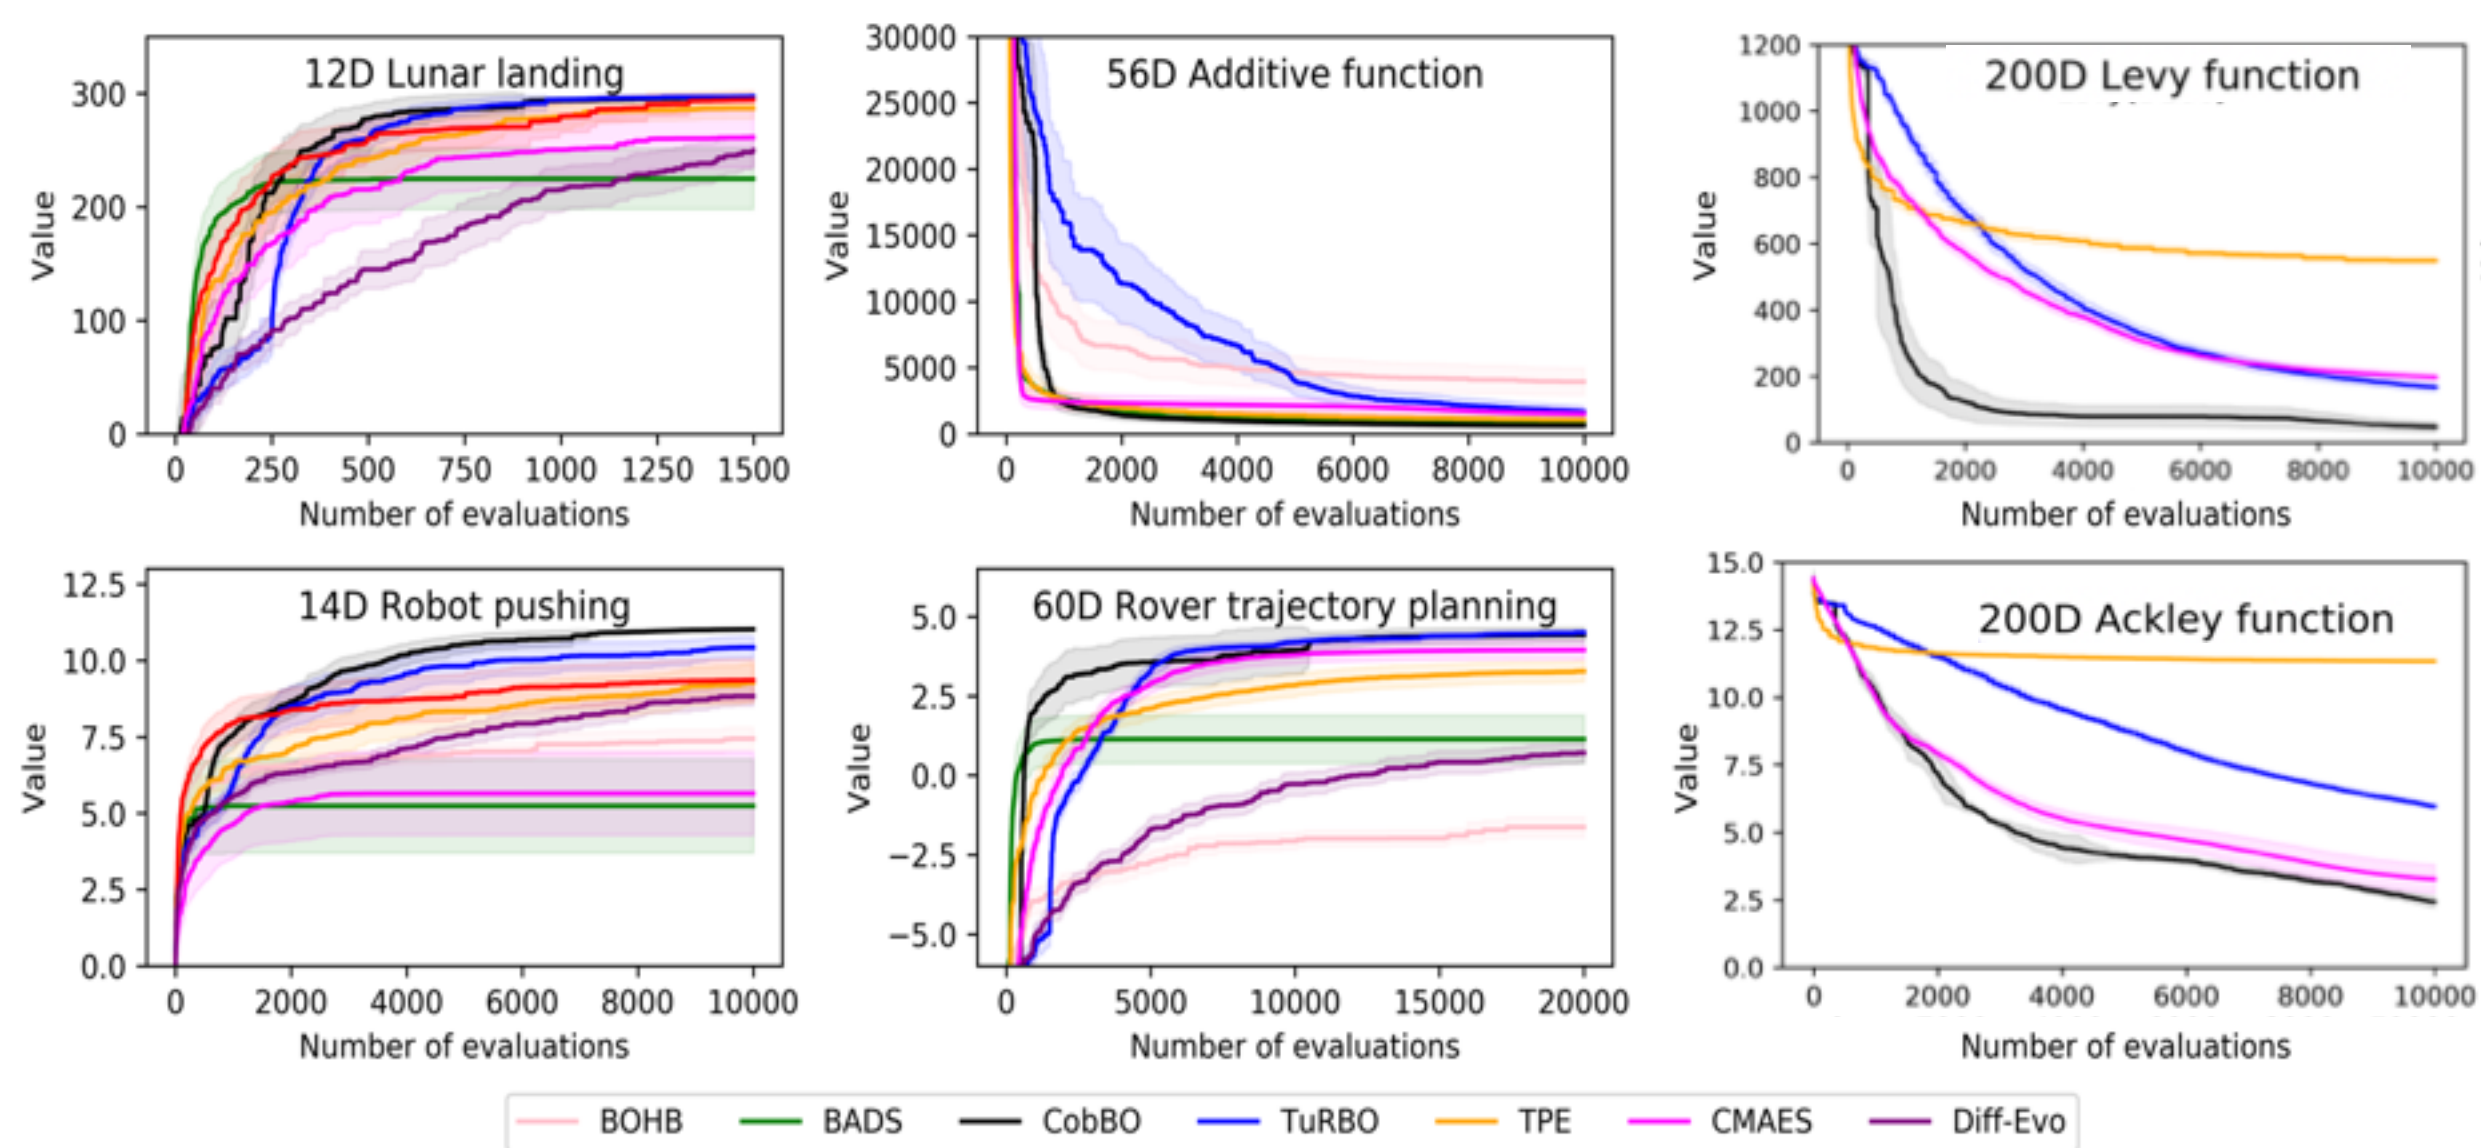

Supplement: supplementary_material [file attachment]

Ackley(10D)

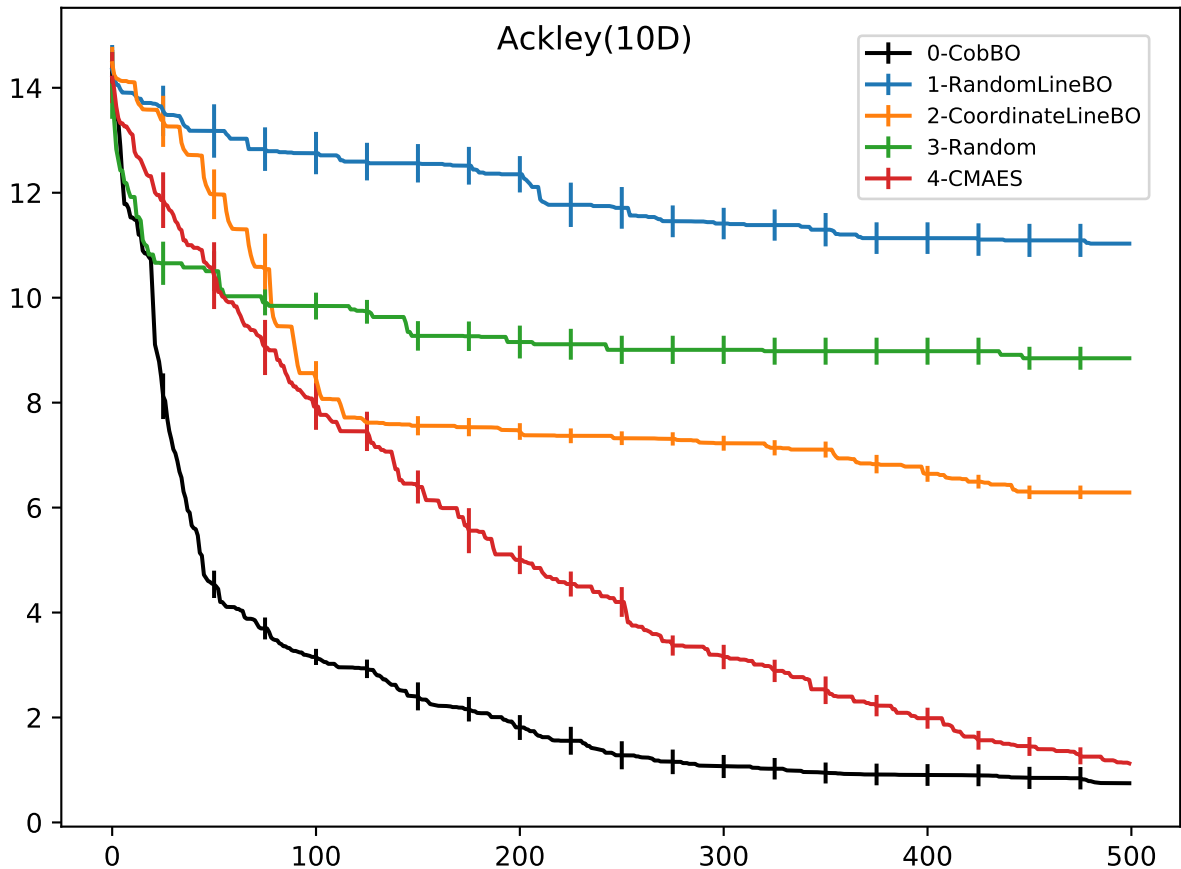

Supplement: supplementary_material [file attachment]

Coordinate Block Size

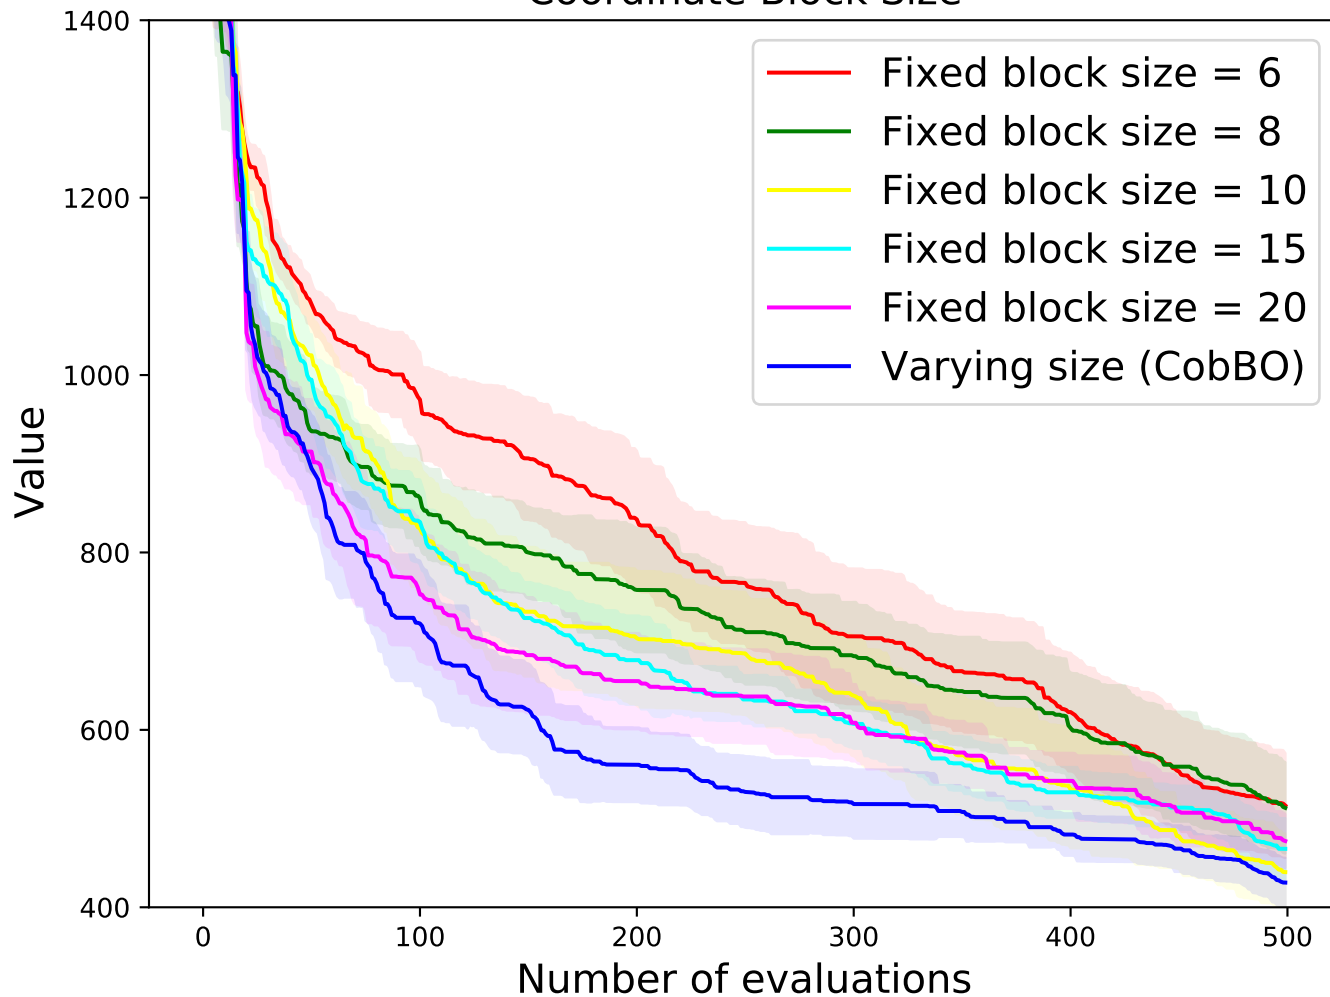

Supplement: supplementary_material [file attachment]

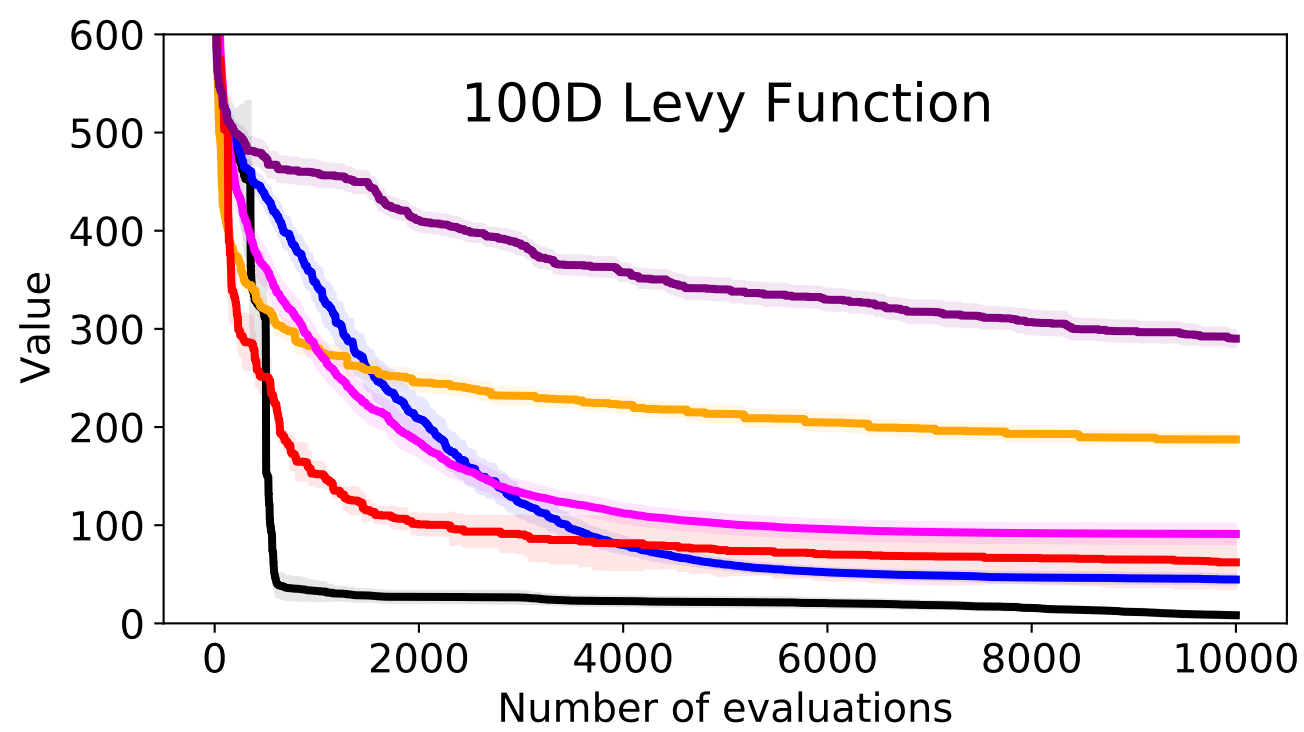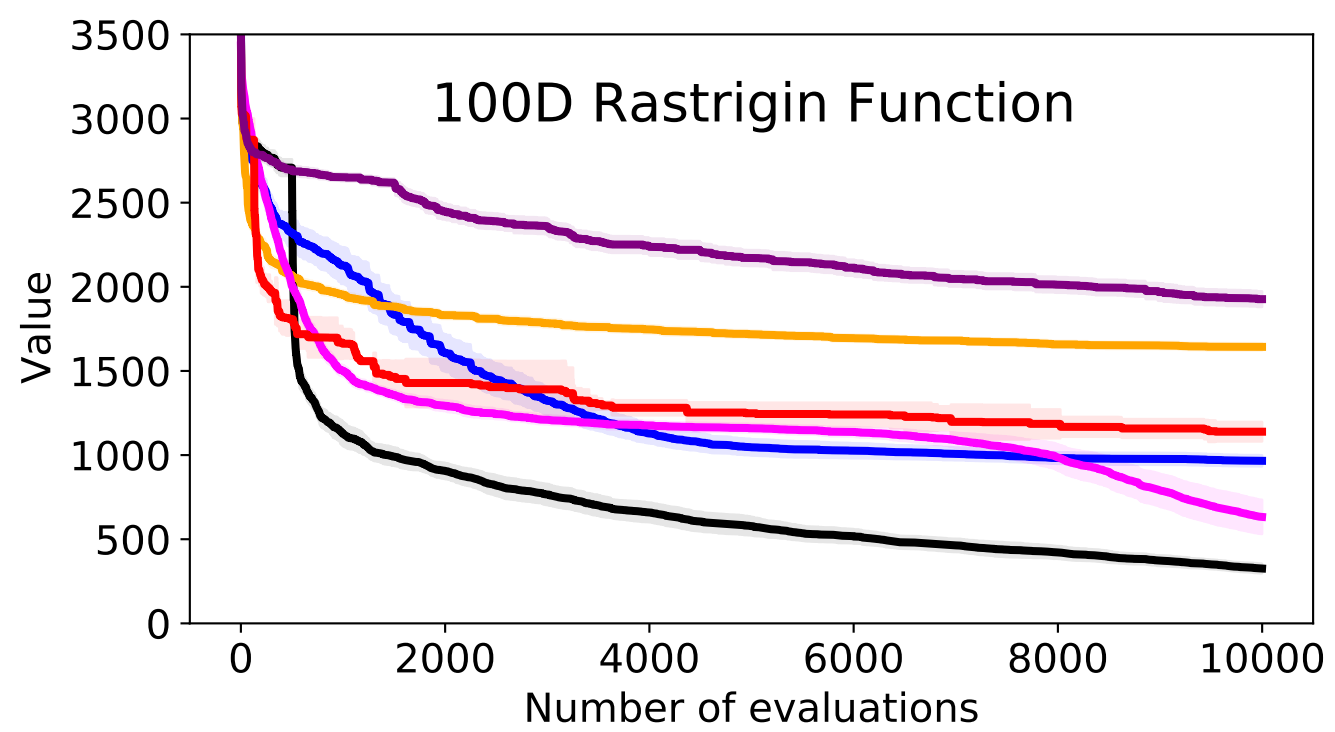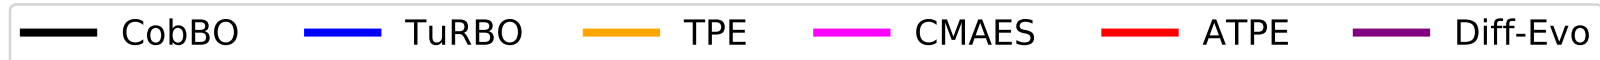

Supplement: supplementary_material [file attachment]

Ackley(D10)

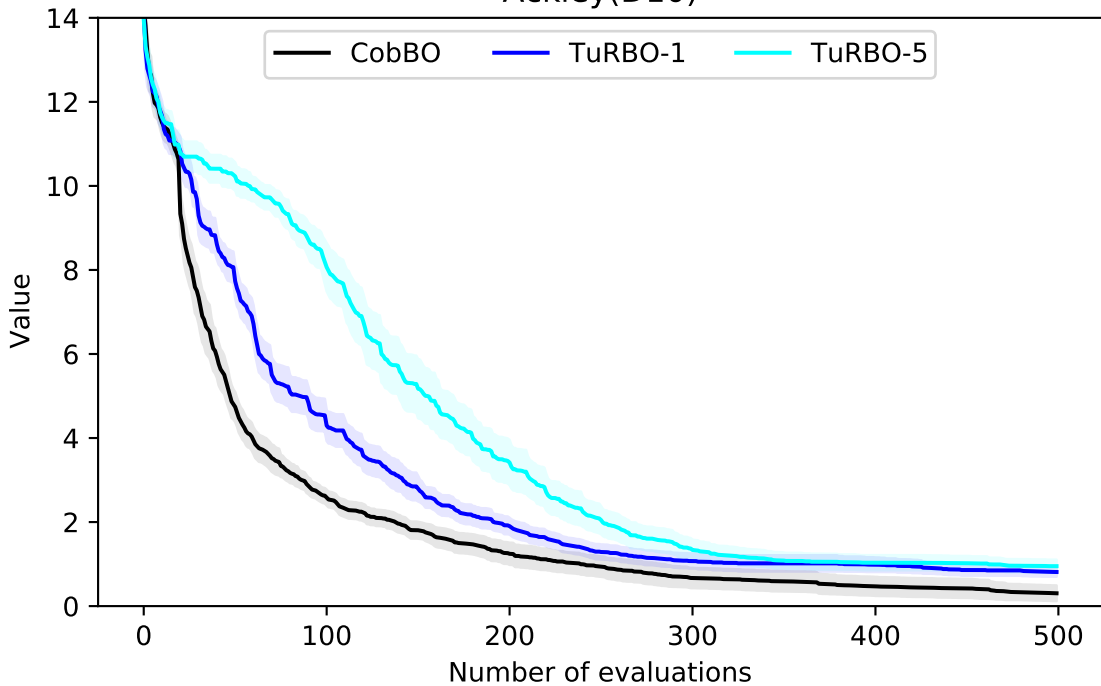

Supplement: supplementary_material [file attachment]

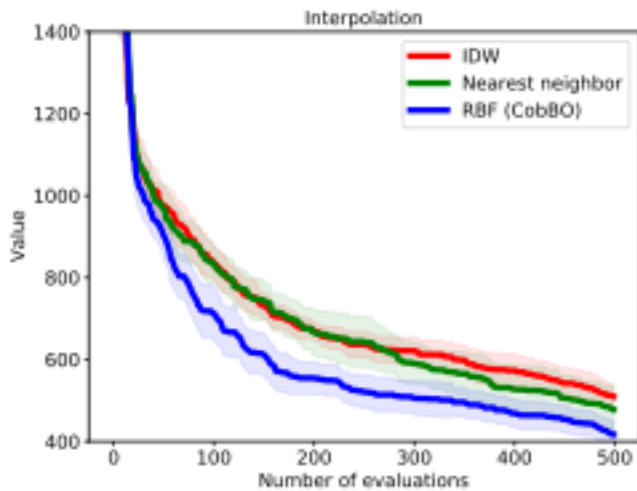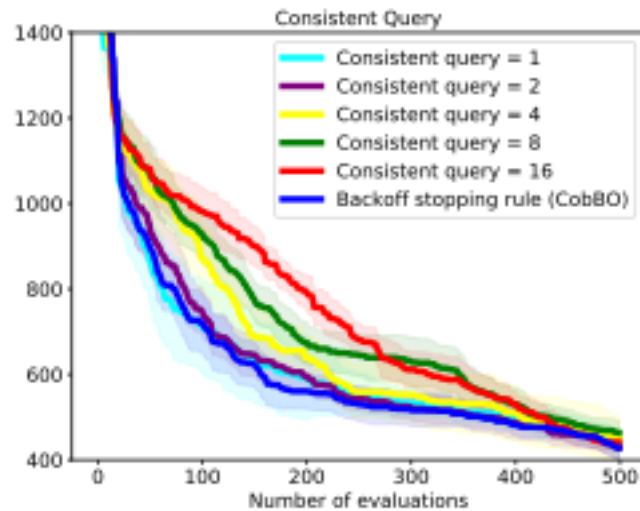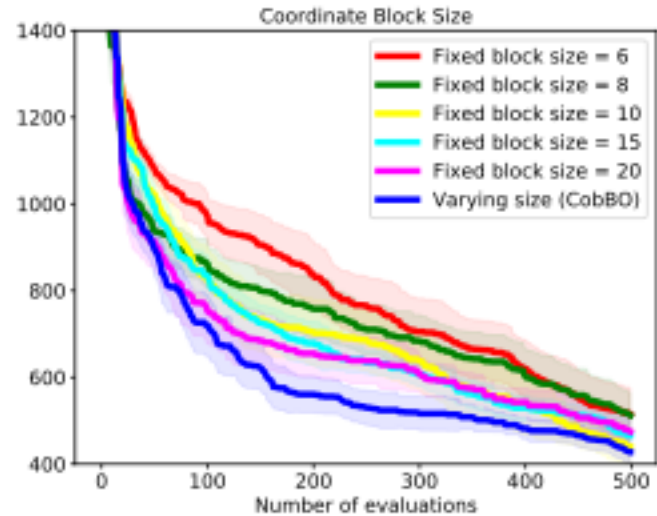

Supplement: supplementary_material [file attachment]

Coordinate Selection: Probability and Entropy

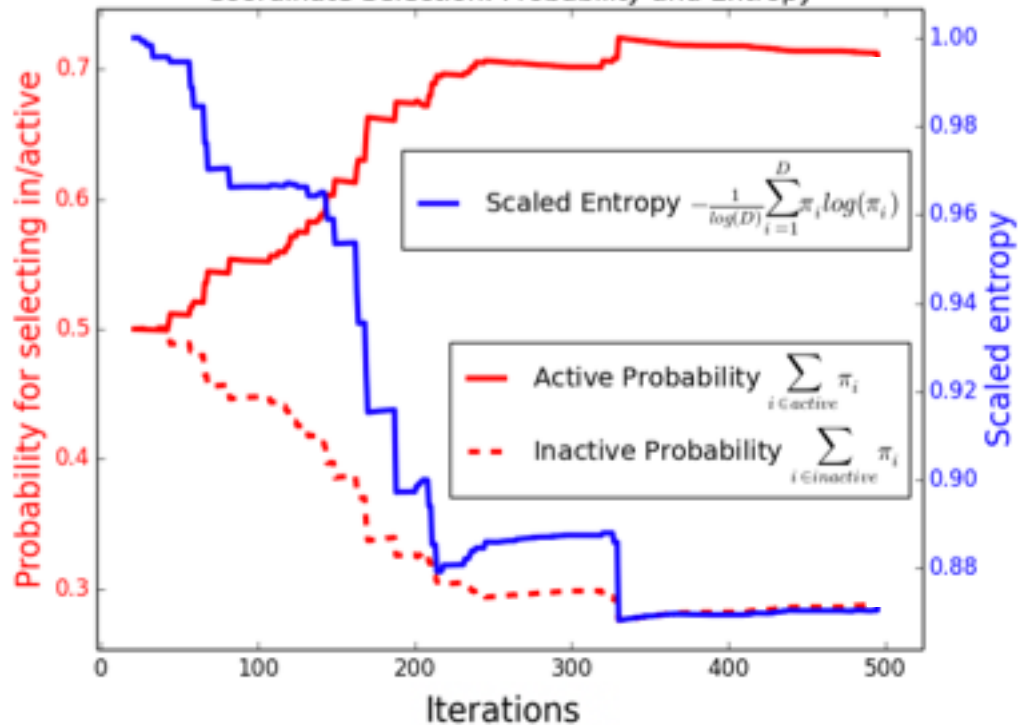

Supplement: supplementary_material [file attachment]

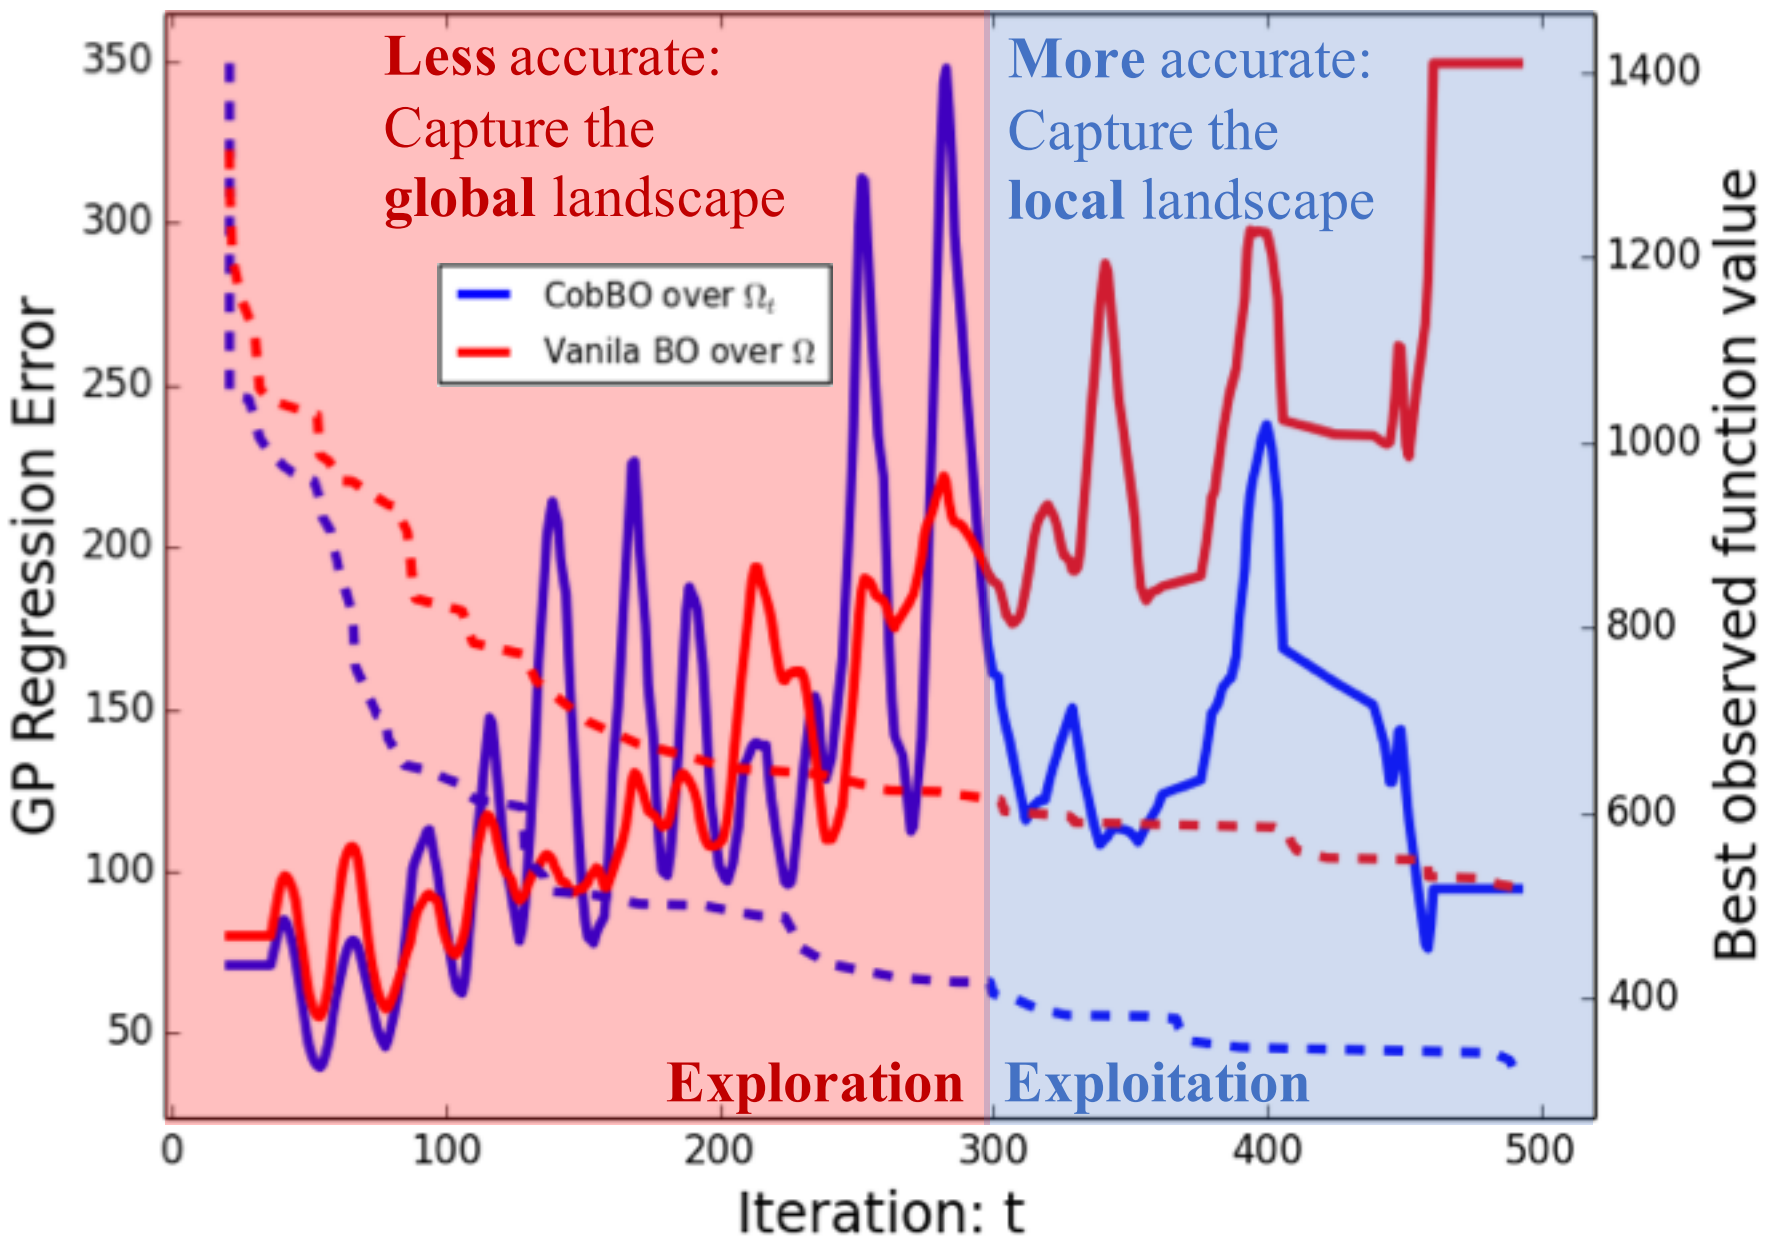

Supplement: supplementary_material [file attachment]

# Coordinate Selection Probability

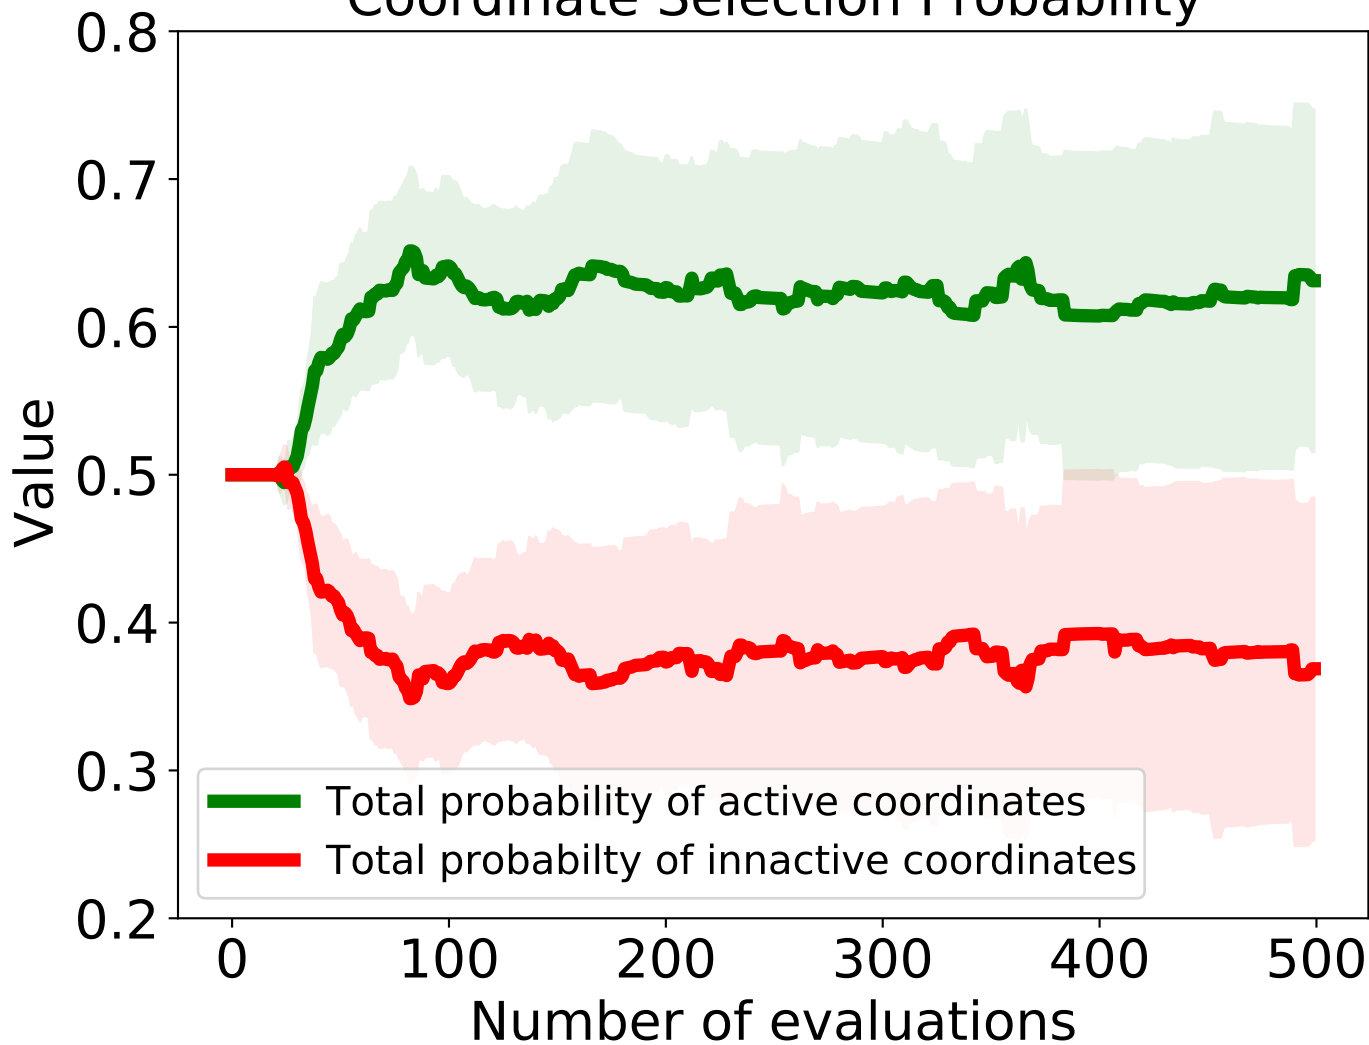

Supplement: supplementary_material [file attachment]

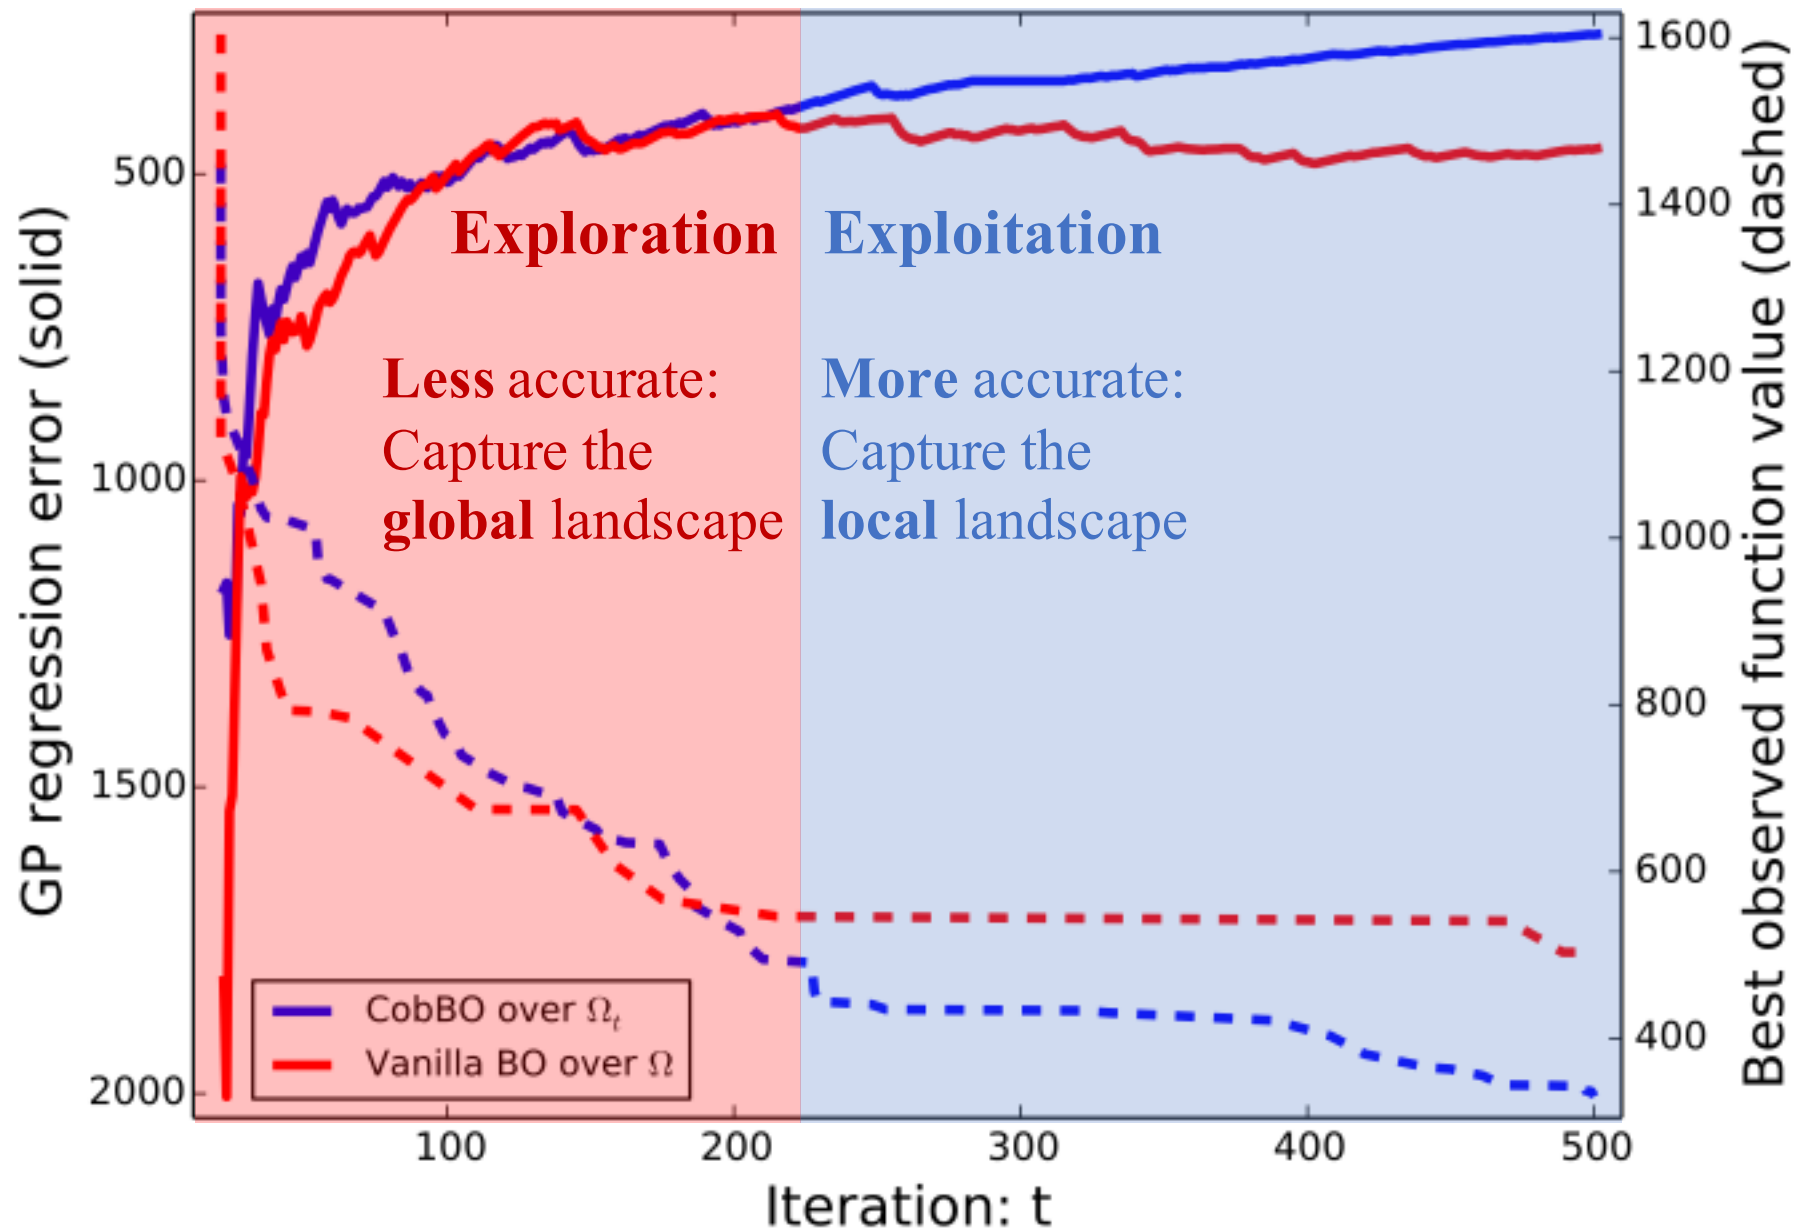

Supplement: supplementary_material [file attachment]

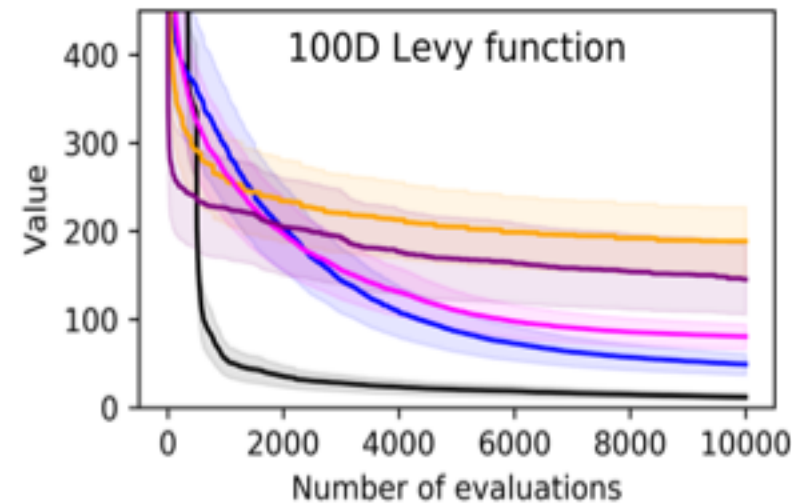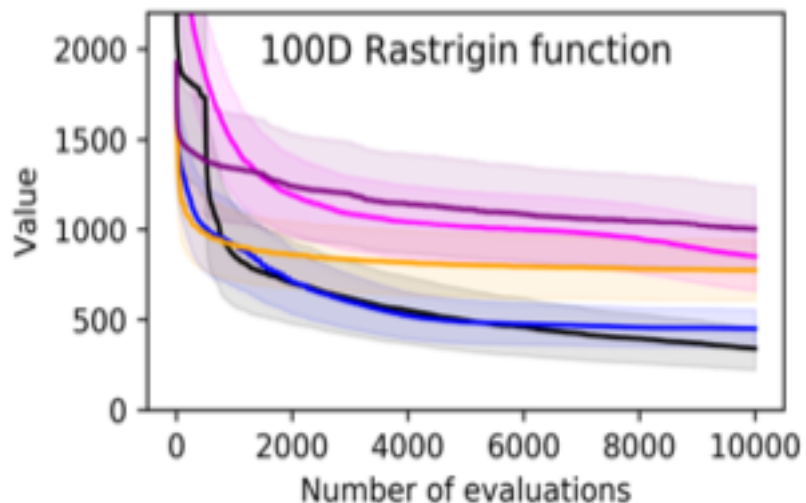

— CobBO — TuRBO — TPE — CMAES — Diff-Evo

Supplement: supplementary_material [file attachment]

# Ackley(D10)

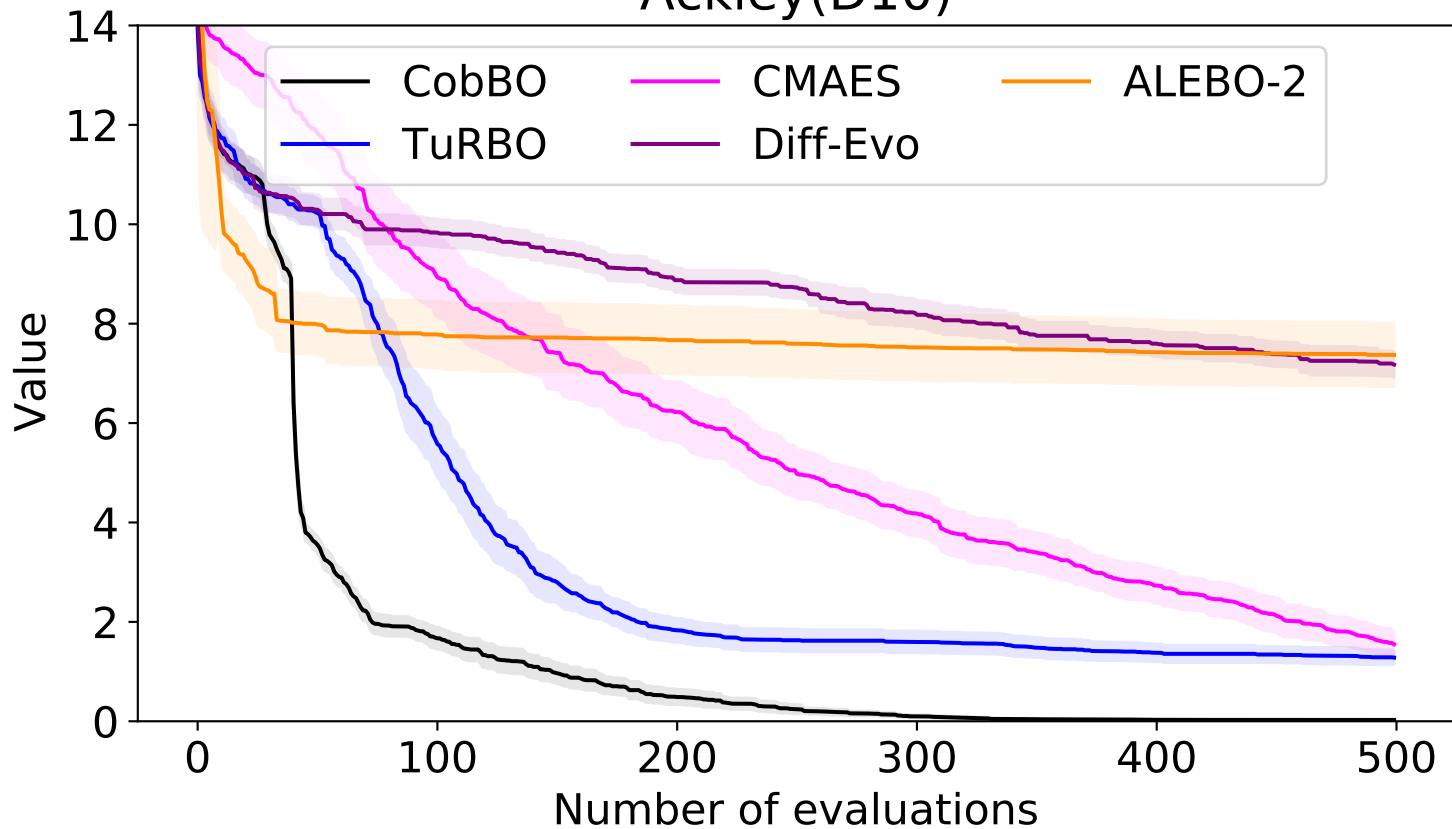

Supplement: supplementary_material [file attachment]

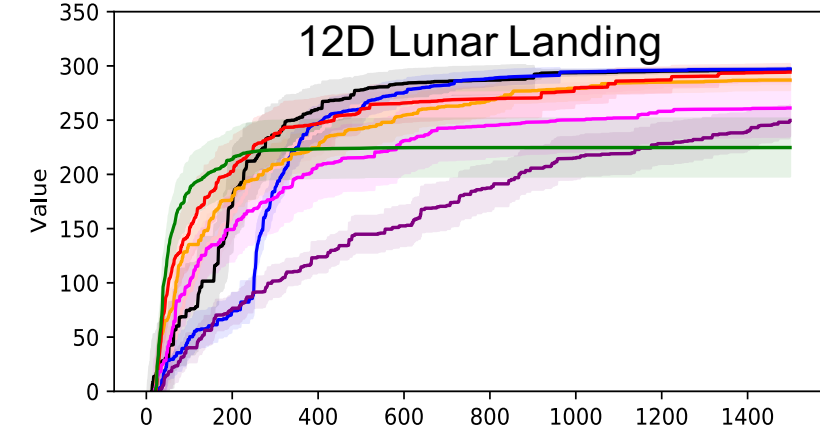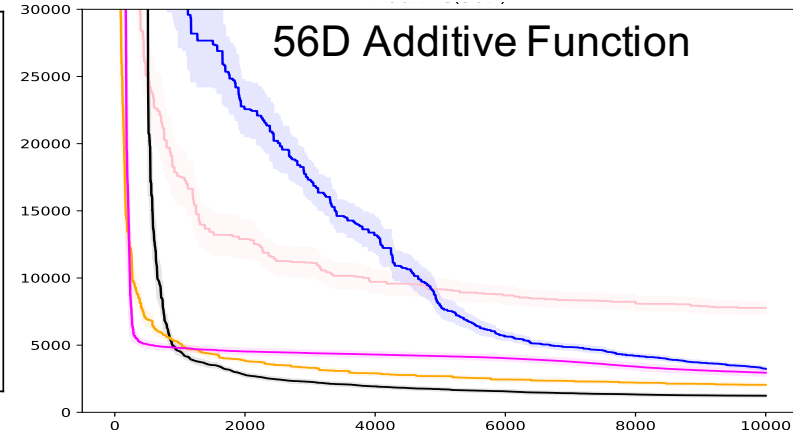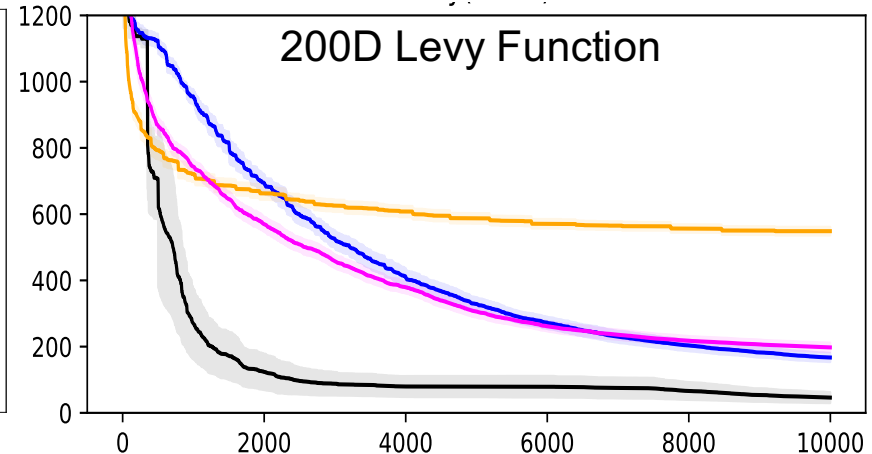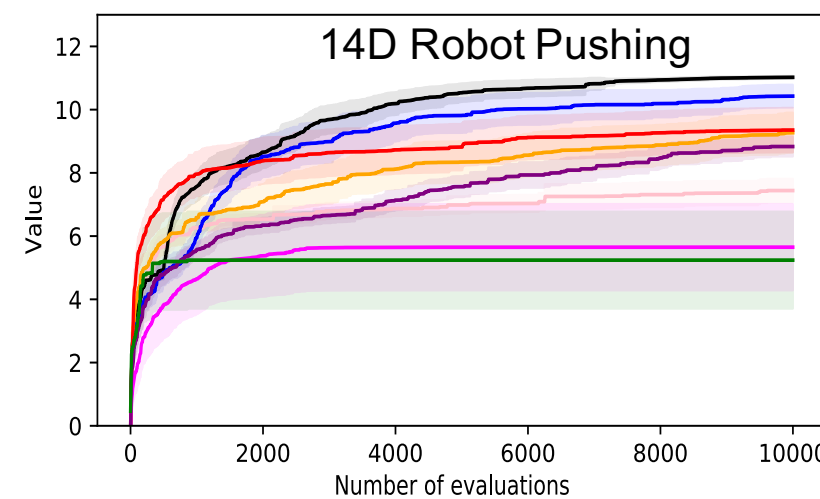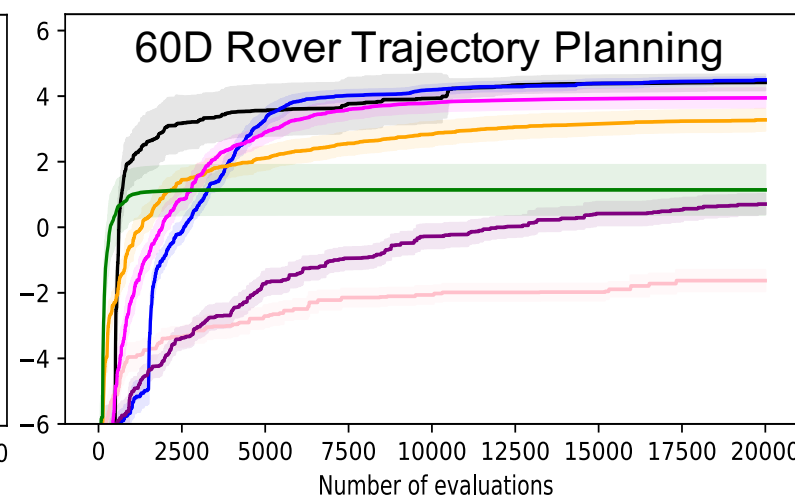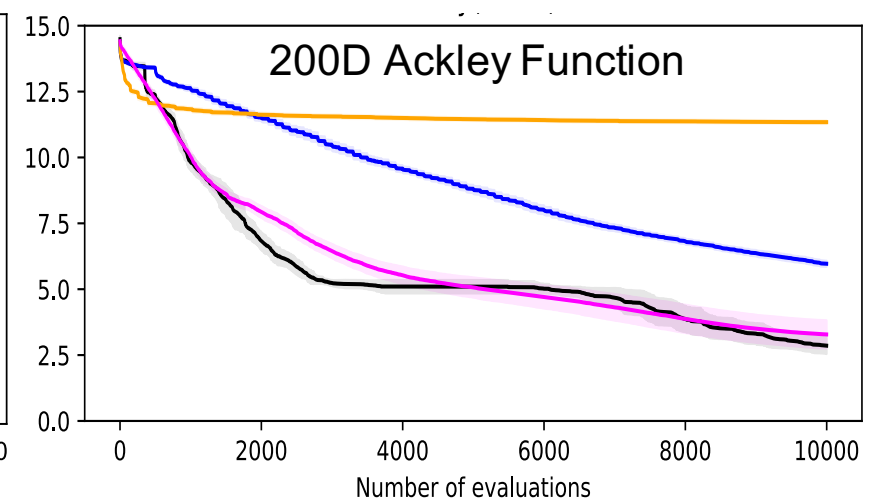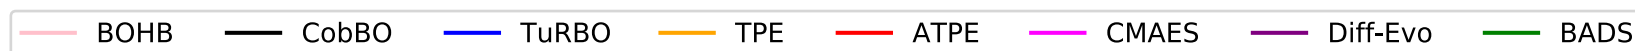

Supplement: supplementary_material [file attachment]

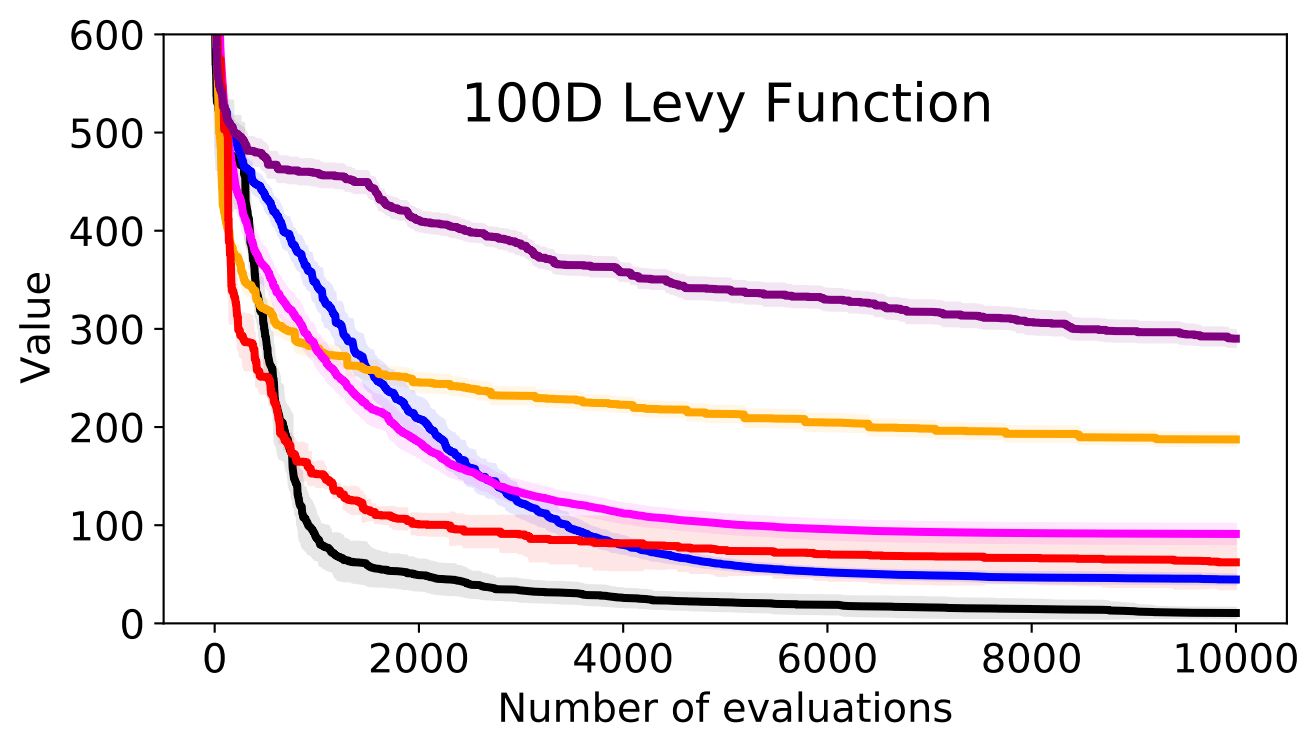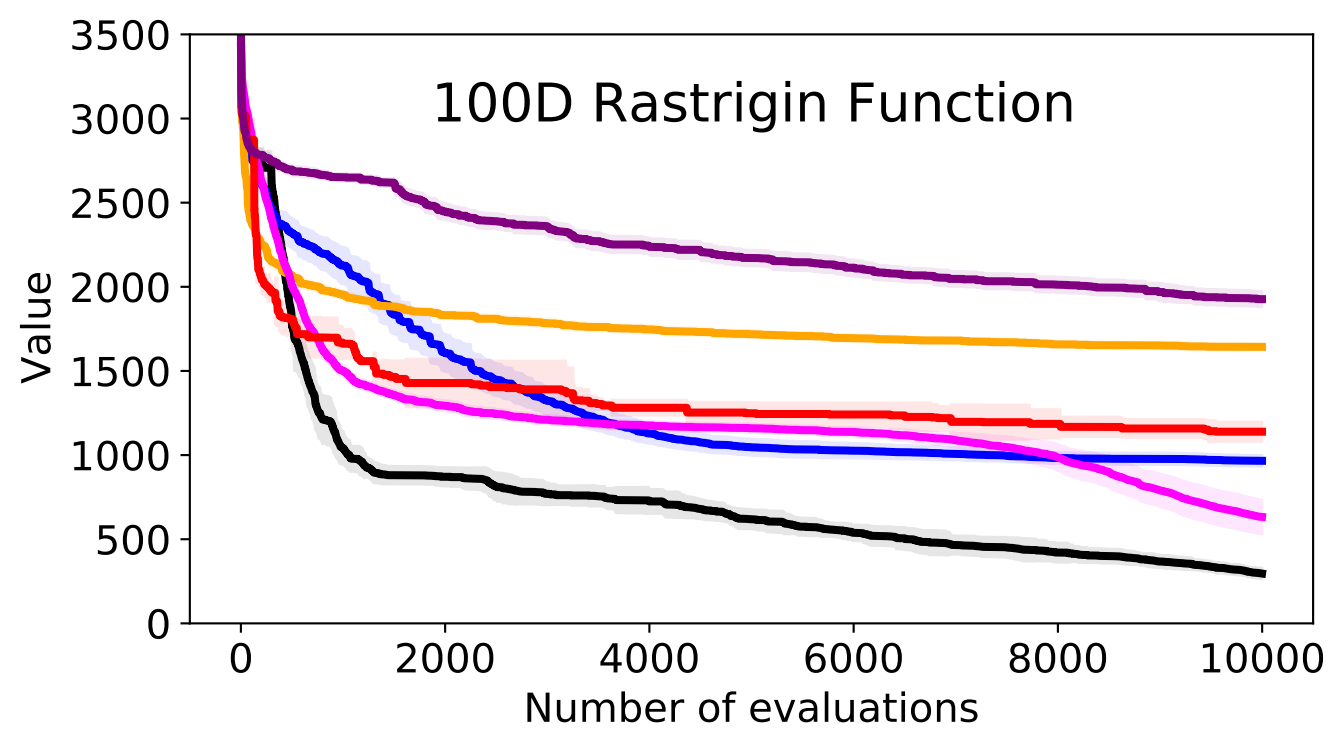

Supplement: supplementary_material [file attachment]
